# Supplementary material for: The impact of physical activity and exercise interventions for physical health in people with cystic fibrosis: protocol for a systematic review
Source: Springer Nature journal article supplement (doi:10.1186/s13643-021-01614-8), 2021-02-26
Supplement: MOESM2 [file 18908364]

Appendix 2: Data Extraction Forms.

**'Exercise and physical activity for physical health in cystic fibrosis'**

**PROSPERO CRD42020184411**

|                                                   |  |                                       |  |
|---------------------------------------------------|--|---------------------------------------|--|
| <b>Date form completed</b><br><i>(dd/mm/yyyy)</i> |  | <b>Name of person extracting data</b> |  |
| <b>Date form checked</b><br><i>(dd/mm/yyyy)</i>   |  | <b>Name of person checking data</b>   |  |

**1. Study Details**

|                                                                                                                    |                                                                                                          |
|--------------------------------------------------------------------------------------------------------------------|----------------------------------------------------------------------------------------------------------|
| <b>Covidence ID</b>                                                                                                |                                                                                                          |
|                                                                                                                    |                                                                                                          |
| <b>Study ID</b> <i>(surname of first author and year first full report of study was published e.g. Smith 2001)</i> |                                                                                                          |
|                                                                                                                    |                                                                                                          |
| <b>Report ID</b> <i>(if different to Study ID)</i>                                                                 | <b>Report IDs of other reports of this study</b> <i>(e.g. duplicate publications, follow-up studies)</i> |
| <i>Title</i>                                                                                                       |                                                                                                          |
| <i>Reference citation</i>                                                                                          |                                                                                                          |
| <i>Study author contact details</i>                                                                                |                                                                                                          |
| <i>Publication type</i><br><i>(e.g. full report, abstract, letter)</i>                                             |                                                                                                          |

## 2. Study Eligibility

| Study Characteristic                                                                                                  | Eligibility criteria                                                 | Eligibility criteria met? |                          |                          | Page no. |
|-----------------------------------------------------------------------------------------------------------------------|----------------------------------------------------------------------|---------------------------|--------------------------|--------------------------|----------|
|                                                                                                                       |                                                                      | Yes                       | No                       | Unclear                  |          |
| <i>Participants</i>                                                                                                   | Does this include patients with cystic fibrosis?                     | <input type="checkbox"/>  | <input type="checkbox"/> | <input type="checkbox"/> |          |
| <i>Intervention</i>                                                                                                   | Does this include an exercise and/or physical activity intervention? | <input type="checkbox"/>  | <input type="checkbox"/> | <input type="checkbox"/> |          |
| <i>Study Design</i>                                                                                                   | Is this study a randomised control trial?                            | <input type="checkbox"/>  | <input type="checkbox"/> | <input type="checkbox"/> |          |
| <b>INCLUDE</b> <input type="checkbox"/> <b>QUERY</b> <input type="checkbox"/> <b>EXCLUDE</b> <input type="checkbox"/> |                                                                      |                           |                          |                          |          |
| <i>Reason for exclusion (tick more than one if necessary)</i>                                                         | Does not include people with cystic fibrosis                         | <input type="checkbox"/>  |                          |                          |          |
|                                                                                                                       | Does not include exercise/PA intervention                            | <input type="checkbox"/>  |                          |                          |          |
|                                                                                                                       | Is not a randomised control trial                                    | <input type="checkbox"/>  |                          |                          |          |

**DO NOT PROCEED IF STUDY IS EXCLUDED FROM REVIEW**

### 3. Study Data

| Study Characteristic | Data                                                                                                |                                                               | Location in text (page no./table no.) |
|----------------------|-----------------------------------------------------------------------------------------------------|---------------------------------------------------------------|---------------------------------------|
| <i>Methods</i>       | Brief aim of study:<br><i>(e.g. To investigate running intervention on severe CF)</i>               |                                                               |                                       |
|                      | Intervention Design<br><i>(e.g. Gym based; running; 50% max heart rate; 3 times/week; 12 weeks)</i> | Location:<br>Modality:<br>Intensity:<br>Frequency:<br>Length: |                                       |
|                      | Control Group<br><i>(e.g. usual care CF)</i>                                                        |                                                               |                                       |
|                      | Single centre/multi-centre(n)?<br><i>(e.g. Single UK CF centre; 12 centres in 3 countries)</i>      |                                                               |                                       |
|                      | Country/countries?<br><i>(e.g. UK, USA, Italy)</i>                                                  |                                                               |                                       |
|                      | Dates patients recruited:<br><i>(e.g. 01/01/2002-31/12/2002)</i>                                    |                                                               |                                       |
|                      | How were patients randomised?<br><i>(e.g. simple, block, stratified, 1:1, 2:2)</i>                  |                                                               |                                       |

|                                                                                  |                                                               |                                |                                                                    |         |
|----------------------------------------------------------------------------------|---------------------------------------------------------------|--------------------------------|--------------------------------------------------------------------|---------|
| <b>Participants</b>                                                              | Inclusion criteria:                                           |                                |                                                                    |         |
|                                                                                  | Exclusion criteria:                                           |                                |                                                                    |         |
|                                                                                  |                                                               | Total                          | Intervention                                                       | Control |
|                                                                                  | Recruited (n)                                                 |                                |                                                                    |         |
|                                                                                  | Baseline Tested (n)                                           |                                |                                                                    |         |
|                                                                                  | Completed Intervention (n)                                    |                                |                                                                    |         |
|                                                                                  | Completed follow-Up (if applicable) (n)                       |                                |                                                                    |         |
|                                                                                  | Analysed (n)                                                  |                                |                                                                    |         |
|                                                                                  |                                                               | Total                          | Intervention                                                       | Control |
|                                                                                  | Age (mean ± SD)                                               |                                |                                                                    |         |
|                                                                                  | Sex (male: n, %)                                              |                                |                                                                    |         |
|                                                                                  | Genotype ( $\Delta$ F508/ $\Delta$ F508: n, %)                |                                |                                                                    |         |
| FEV <sub>1</sub> Category*(mild/mod/severe, n)                                   |                                                               |                                |                                                                    |         |
| <b>Outcomes</b><br><i>(please label numerically to align with results below)</i> | Parameter ( <i>e.g. FEV<sub>1</sub>, exercise tolerance</i> ) |                                | Measurement Scale ( <i>e.g. litres, %pred, VO<sub>2max</sub></i> ) |         |
|                                                                                  | 1.                                                            |                                | 1.                                                                 |         |
|                                                                                  | 2.                                                            |                                | 2.                                                                 |         |
| 3.                                                                               |                                                               | 3.                             |                                                                    |         |
| <b>Results</b><br><i>(As per numerical</i>                                       | Change from baseline (intervention)                           | Change from baseline (control) | Intervention vs. Control difference post-intervention              |         |
|                                                                                  | 1.                                                            | 1.                             | 1.                                                                 |         |

|                                         |          |          |          |  |
|-----------------------------------------|----------|----------|----------|--|
| <i>assignment above)</i>                | 2.<br>3. | 2.<br>3. | 2.<br>3. |  |
| <i>Follow-up Length (if applicable)</i> |          |          |          |  |
| <i>Conflicts of Interest</i>            |          |          |          |  |
| <i>Notes of interest</i>                |          |          |          |  |
| <i>Missing information</i>              |          |          |          |  |

\*FEV<sub>1</sub> Categories are as follows: Mild ≥70%, Moderate 40-69%, Severe <40%.
